# Supplementary material for: Microwave synthesis and field effect transistor performance of stable colloidal indium-zinc-oxide nanoparticles
Source: Royal Society of Chemistry journal article supplement (doi:10.1039/c3ra44222e), 2013-01-01
Supplement: c3ra44222e.pdf [file c3ra44222e.pdf]

Supplementary material (ESI) for RSC Advances  
This journal is © The Royal Society of Chemistry 2013

## Microwave synthesis and field effect transistor performance of stable colloidal indium-zinc-oxide nanoparticles

Shawn Sanctis, Rudolf C. Hoffmann, Jörg J. Schneider\*

### Supplementary information

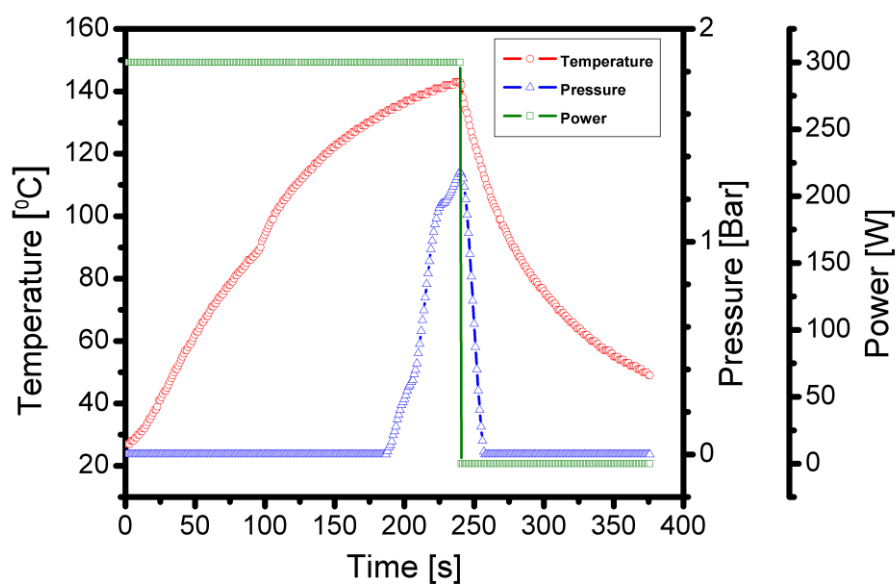

**Figure 1:** Development of temperature, pressure and power in the microwave oven during the IZO synthesis for 4 minutes.

Supplementary material (ESI) for RSC Advances  
This journal is © The Royal Society of Chemistry 2013

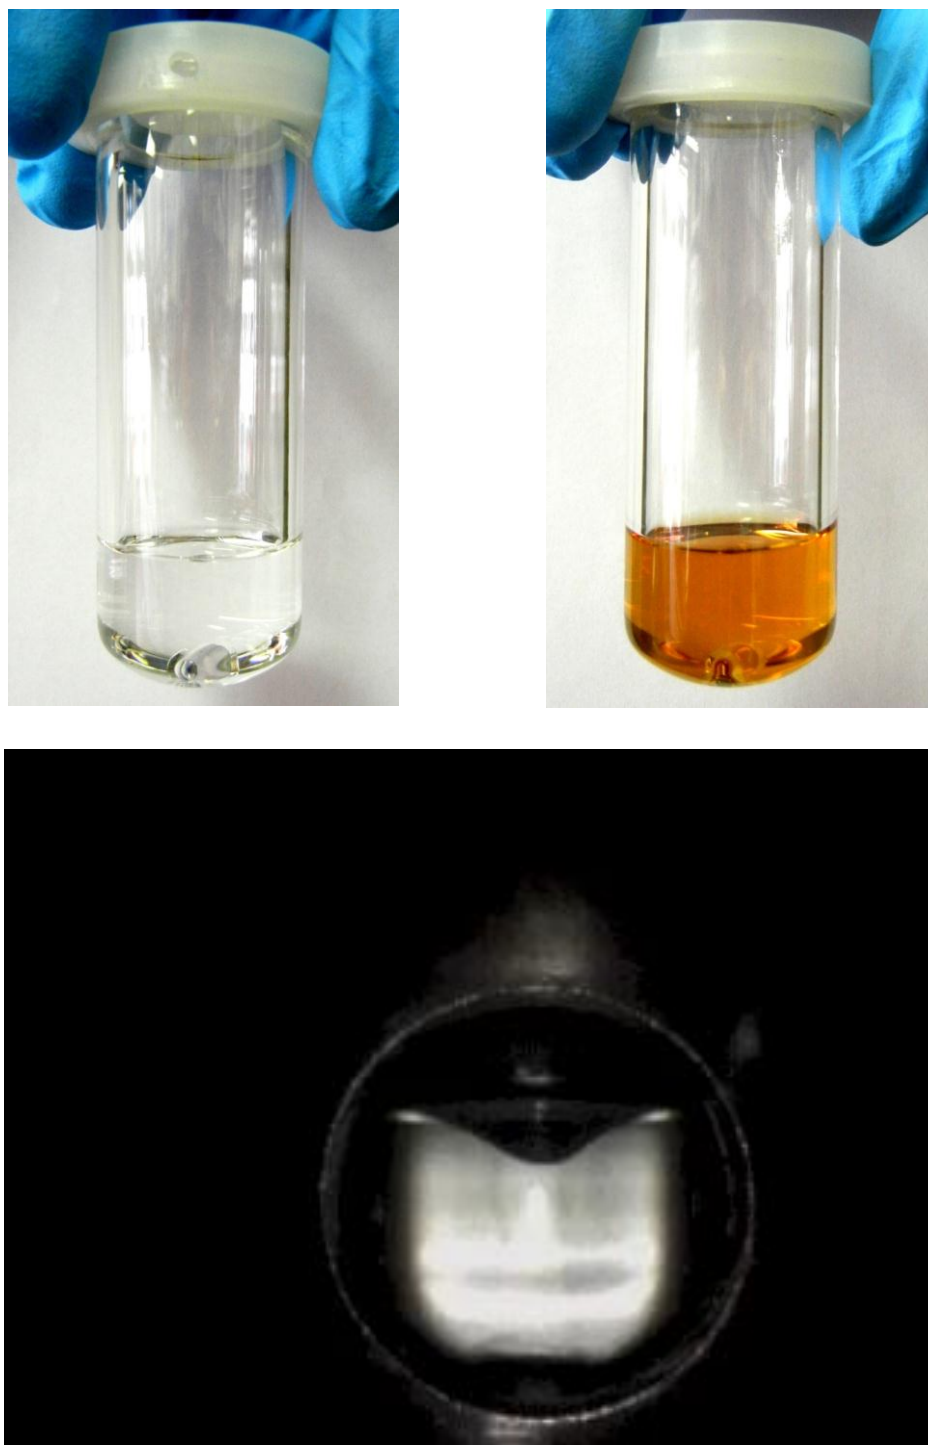

**Figure 2:** Upper trace: Photograph of an indium and zinc precursor mixture before (above left) and after microwave synthesis (above right);  
Lower trace: Real time video sequence showing the formation of the stable IZO suspensions using microwave irradiation at 140°C. The video can be downloaded.

Supplementary material (ESI) for RSC Advances  
This journal is © The Royal Society of Chemistry 2013

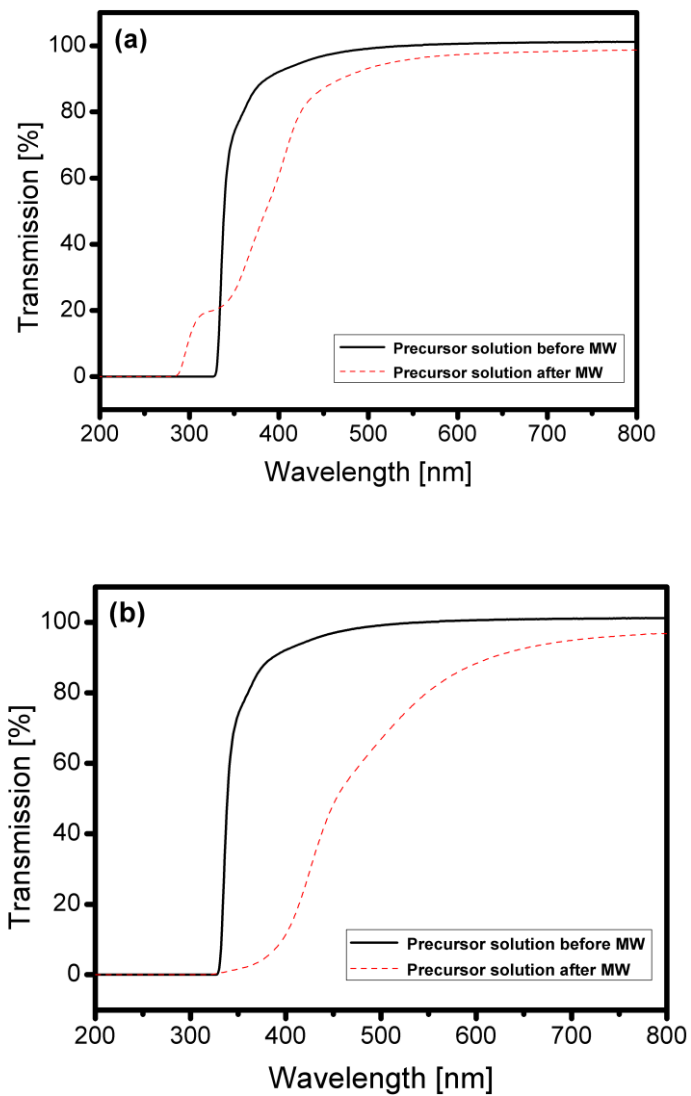

**Figure 3:** UV-Vis spectra of the mixed precursor solution before and after microwave (MW) synthesis using (a) 2-methoxyethanol and (b) 2-ethoxyethanol as a solvent.

Supplementary material (ESI) for RSC Advances  
This journal is © The Royal Society of Chemistry 2013

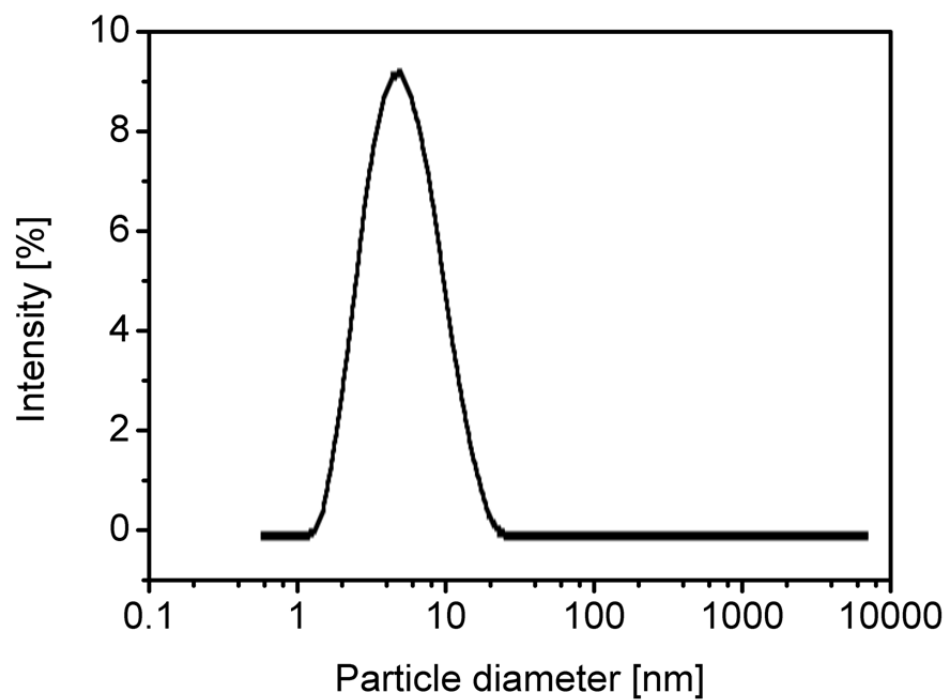

**Figure 4:** Particle size distribution as determined by Dynamic Light Scattering for the as-prepared Indium-zinc-oxide suspension.

Supplementary material (ESI) for RSC Advances  
This journal is © The Royal Society of Chemistry 2013

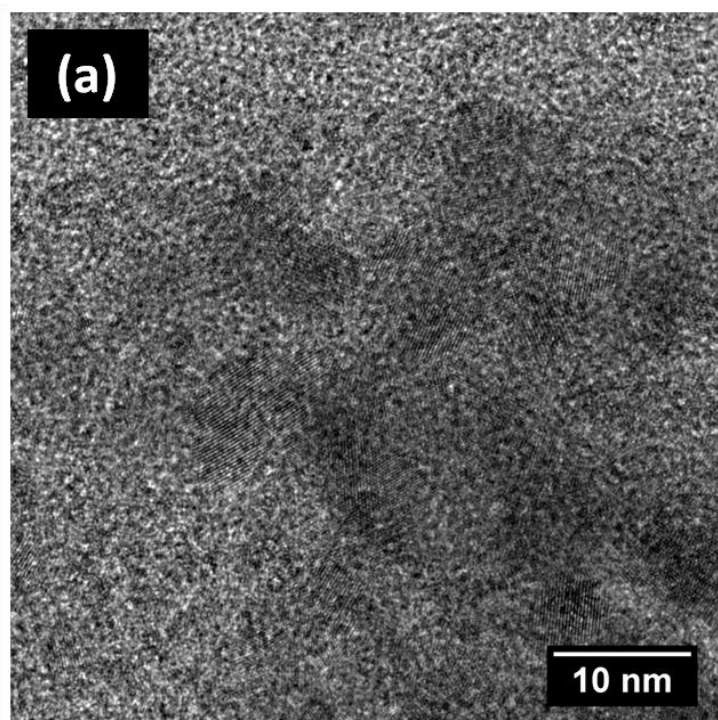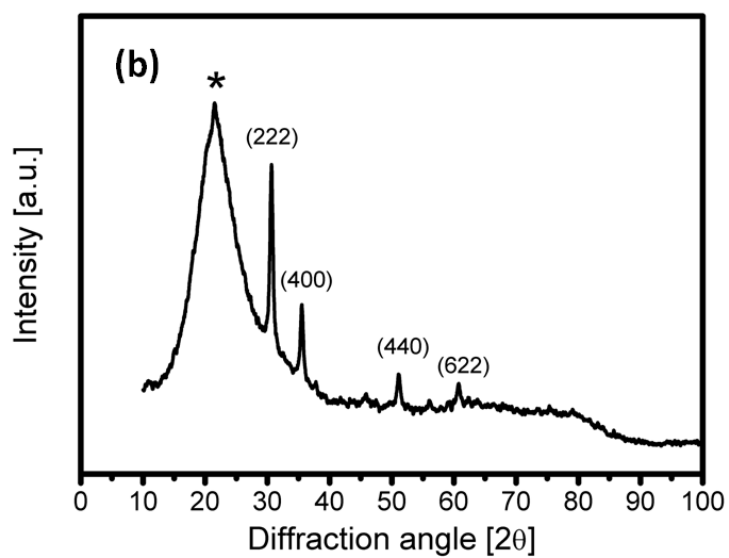

**Figure 5:** (a) HRTEM image of  $\text{In}_2\text{O}_3$  particles and (b) GI-XRD diffractogram of  $\text{In}_2\text{O}_3$  films (\* quartz substrate), both after annealing at 200 °C.

Supplementary material (ESI) for RSC Advances  
This journal is © The Royal Society of Chemistry 2013

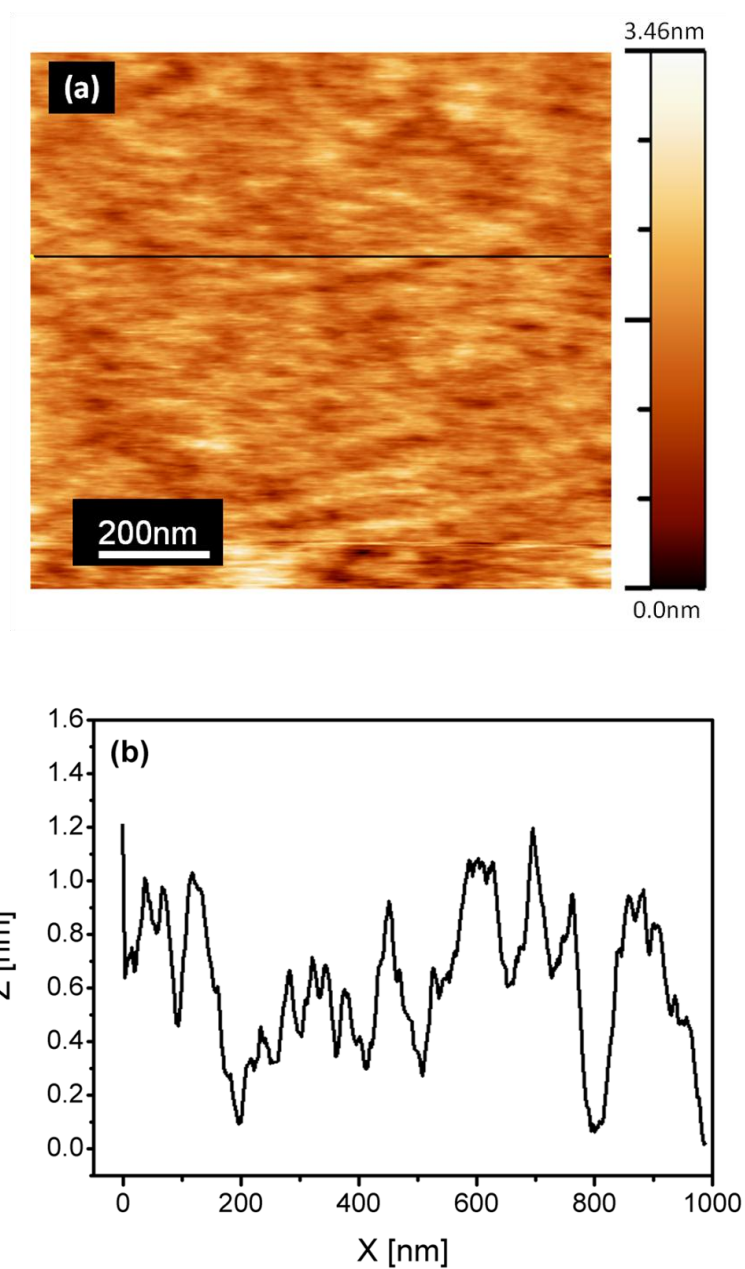

**Figure 6:** (a) AFM topography of an IZO film obtained after annealing at 450 °C (RMS roughness = 1.1 nm) and (b) corresponding height profile along the horizontal line segment marked above in (a).
